# Supplementary material for: Probing the glass transition in reversible cross-linked polymer composites
Source: Royal Society of Chemistry journal article supplement (doi:10.1039/c9ra01942a), 2019-01-01
Supplement: c9ra01942a1.pdf [file c9ra01942a1.pdf]

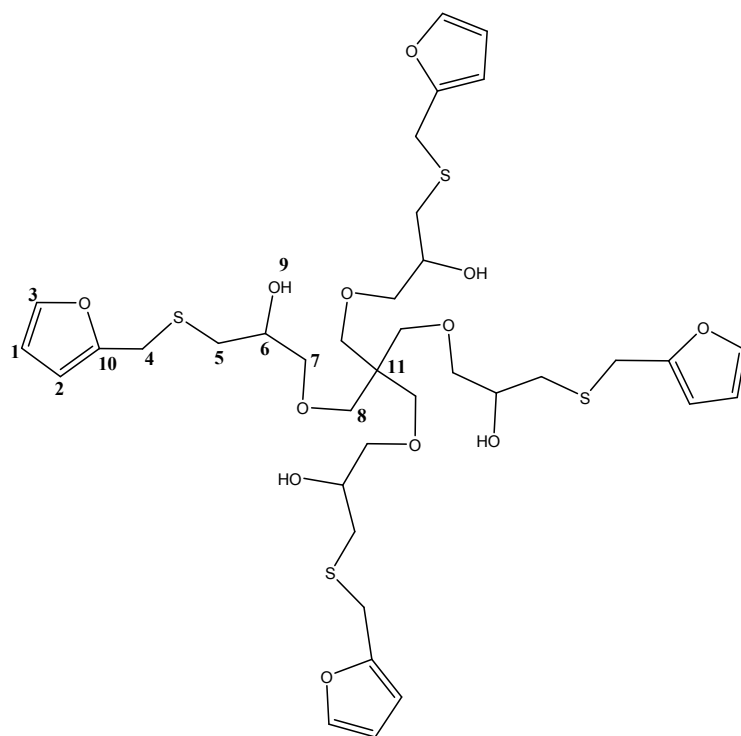

**Figure S1.** The structure of Tetra Furan

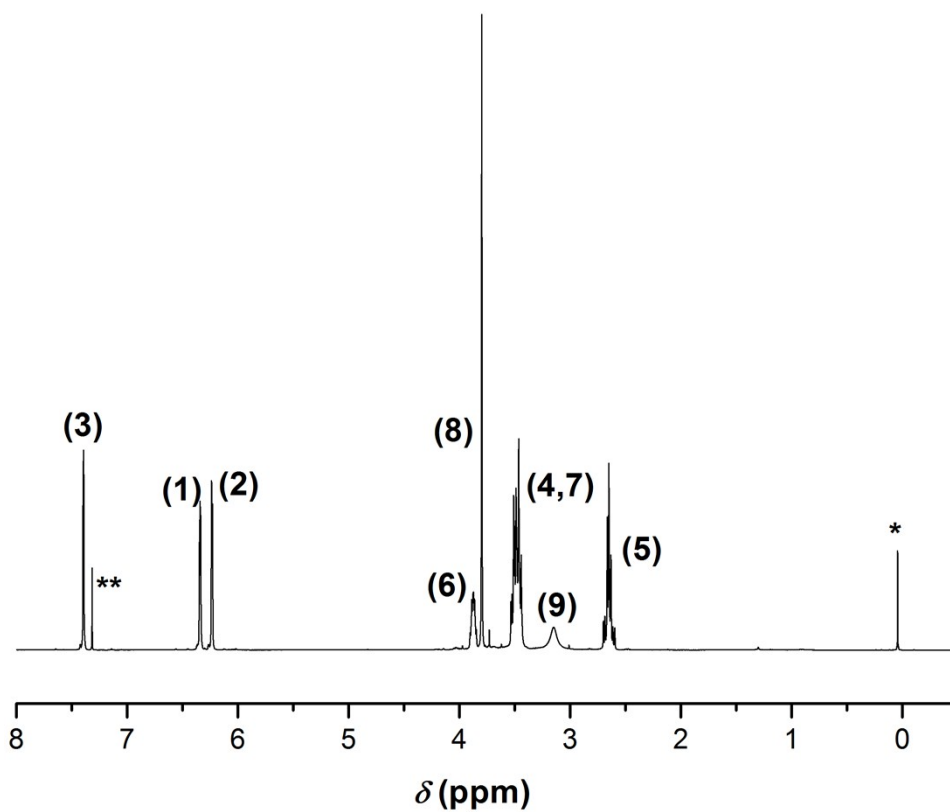

**Figure S2.** The liquid <sup>1</sup>H NMR spectrum of Tetra Furan (\* denotes the TMS signal peak, \*\* denotes the solvent signal peak)

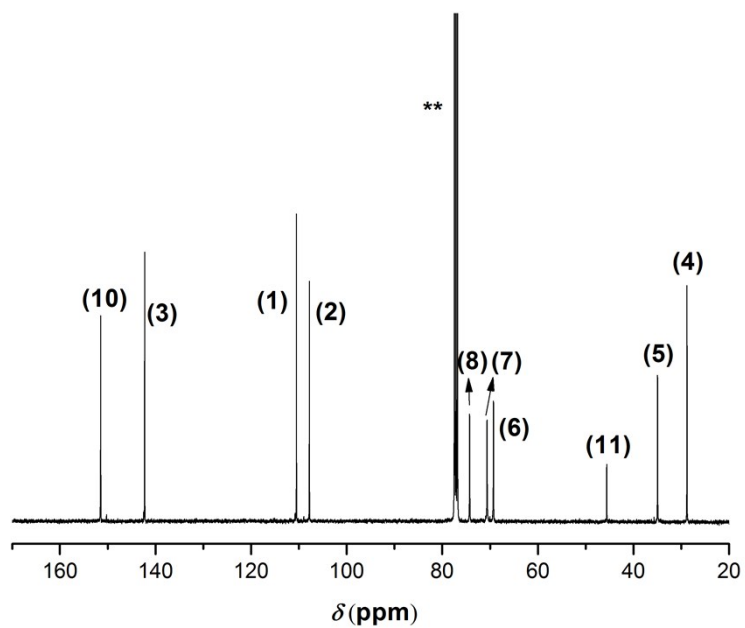

**Figure S3.** The liquid  $^{13}\text{C}$  NMR spectrum of Tetra Furan (\*\* denotes the solvent signal peak)
